# Supplementary material for: The adsorption and oxidation of SO2on MgO surface: experimental and DFT calculation studies
Source: Royal Society of Chemistry journal article supplement (doi:10.1039/c9en01474h), 2020-01-01
Supplement: c9en01474h1.pdf [file c9en01474h1.pdf]

# The adsorption and oxidation of SO<sub>2</sub> on MgO surface: Experimental and DFT calculation studies

*Honghong Wang<sup>1</sup>, Cheng Zhong<sup>1,3</sup>, Qingxin Ma<sup>1,2,3</sup>\*, Jinzhu Ma<sup>1,2,3</sup>, Hong He<sup>1,2,3</sup>*

<sup>1</sup> State Key Joint Laboratory of Environment Simulation and Pollution Control, Research Center for Eco-Environmental Sciences, Chinese Academy of Sciences, Beijing 100085, China

<sup>2</sup> Center for Excellence in Regional Atmospheric Environment, Institute of Urban Environment, Chinese Academy of Sciences, Xiamen 361021, China

<sup>3</sup> College of Resources and Environment, University of Chinese Academy of Sciences, Beijing 100049, China

## **Corresponding Author**

\*Qingxin Ma (qxma@rcees.ac.cn)

\*Tel: 86-10-62849508; fax: 86-10-62849508

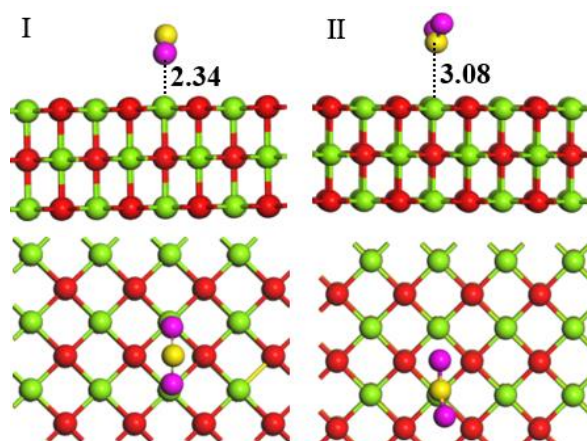

**Fig. S1** Another two optimized configurations of SO<sub>2</sub> on perfect MgO(00) surface

**Table S1.** The IR vibrational frequencies and adsorption energies of adsorbed SO<sub>2</sub> at the MgO (001) surface (frequencies in cm<sup>-1</sup>, adsorption energies in eV).

|                           | Modes      | I     | II    | III   | SO <sub>2</sub> |
|---------------------------|------------|-------|-------|-------|-----------------|
| SO <sub>2</sub> frequency | $\delta$   | 553   | 484   | 493   | 492             |
|                           | $\nu_s$    | 988   | 991   | 1077  | 1089            |
|                           | $\nu_{as}$ | 1056  | 1201  | 1270  | 1277            |
| S-O bond length (Å)       |            | 1.47  | 1.45  | 1.44  | 1.43            |
| Adsorption Energy (eV)    |            | -1.03 | -0.31 | -0.20 | —               |

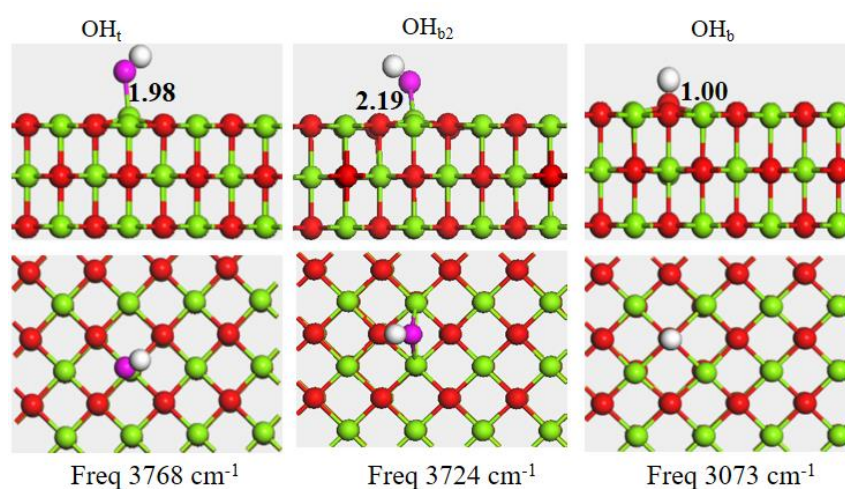

**Fig. S2** The optimized structures of surface OH on MgO(100) surface

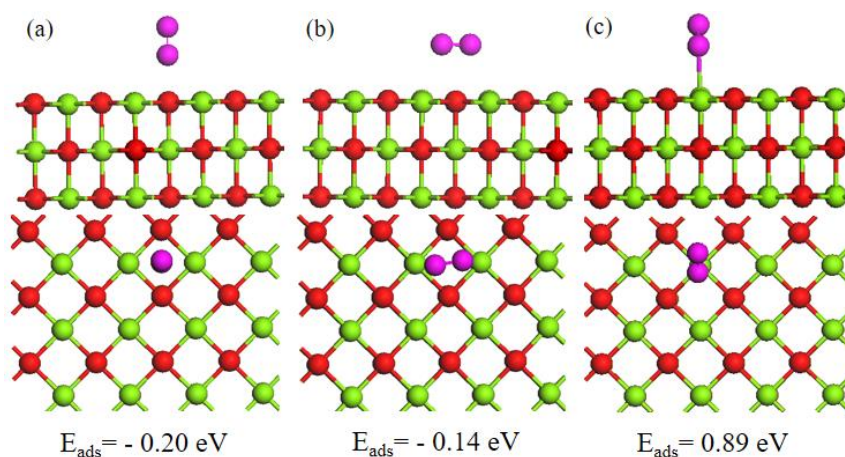

**Fig. S3** The optimized structures and corresponding adsorption energies of  $\text{O}_2$  adsorption on  $\text{MgO}(100)$  surface

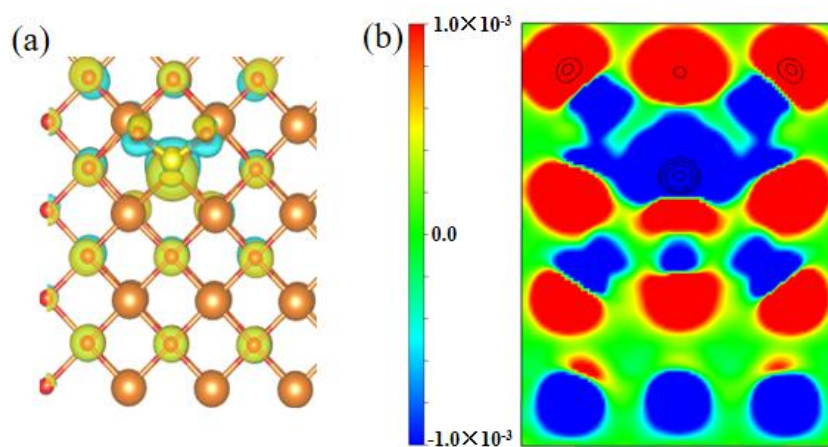

**Fig. S4** Charge Density Difference (CDD) of  $\text{SO}_2$  on a plane of  $\text{MgO}$  surface (a) 3D, the yellow and blue represent the increasment and decrement of electron density, respectively (b) 2D plot of CDD on  $\text{MgO}(001)$  surface, unit is  $\text{e}/\text{bohr}^3$ .

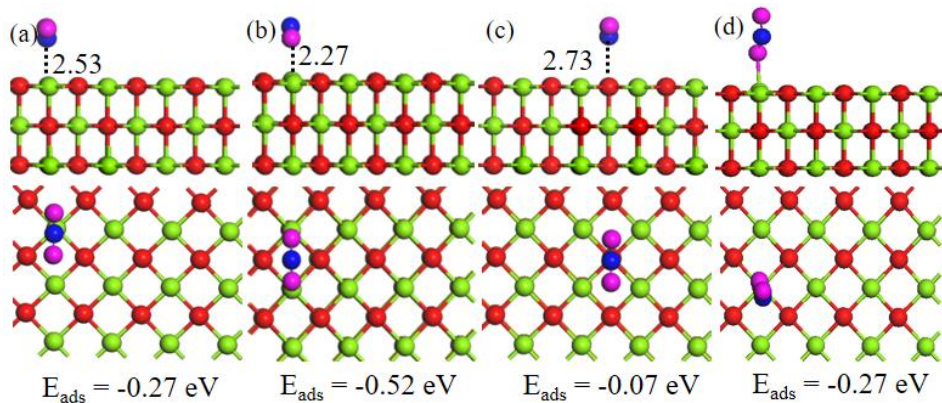

**Fig. S5** The optimized adsorption configurations of  $\text{NO}_2$  on  $\text{MgO}(100)$  surface

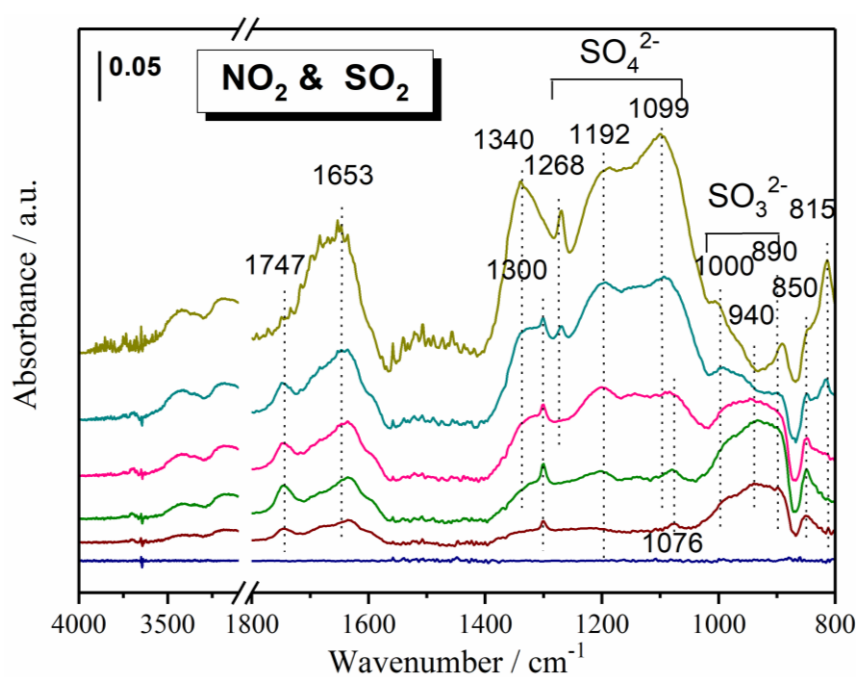

**Fig. S6** Dynamic changes in the *in situ* DRIFTS spectra of the  $\text{CaO}$  sample as a function of time with a flow of 200 ppmv  $\text{SO}_2$  + 200 ppmv  $\text{NO}_2$  + 20%  $\text{O}_2$  + 80%  $\text{N}_2$  at 303 K. Total flow rate was  $100 \text{ mL} \cdot \text{min}^{-1}$ .
